# Supplementary material
Source: PubMed Central journal article supplement (PMC7002239)
Supplement: NIHMS1546226-supplement-2.pdf [file NIHMS1546226-supplement-2.pdf]

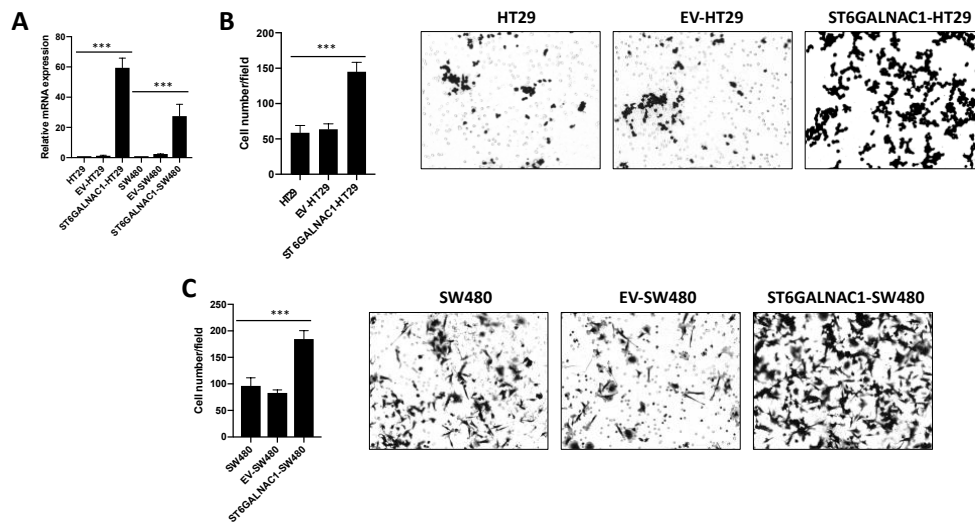

**Supplemental Fig. S2. Over-expression of ST6GALNAC1 induces migratory properties of colon cancer cells.** A) Real-Time PCR. The graphs represent the ST6GALNAC1 mRNA levels relative to actin expression in HT-29 and SW480 colon cancer cells transfected with pcDNA-ST6GALNAC1 plasmid (ST6GALNAC1-HT29 or ST6GALNAC1-SW480) or left untreated. *B* and *C*) Cell migration of ST6GALNAC1-HT29 (*B*) or ST6GALNAC1-SW480 (*C*) was evaluated using transwell migration assay. In control experiments, cells were transfected with the empty vector (EV). Graphs represent the average number of cells counted per field (40X). *P* values are calculated using one-way ANOVA with Tukey post-tests for multiple comparisons. \* $p < 0.05$ , \*\* $p < 0.01$ , \*\*\* $p < 0.001$ .
