# Supplementary material
Source: PubMed Central journal article supplement (PMC7002239)
Supplement: NIHMS1546226-supplement-3.pdf [file NIHMS1546226-supplement-3.pdf]

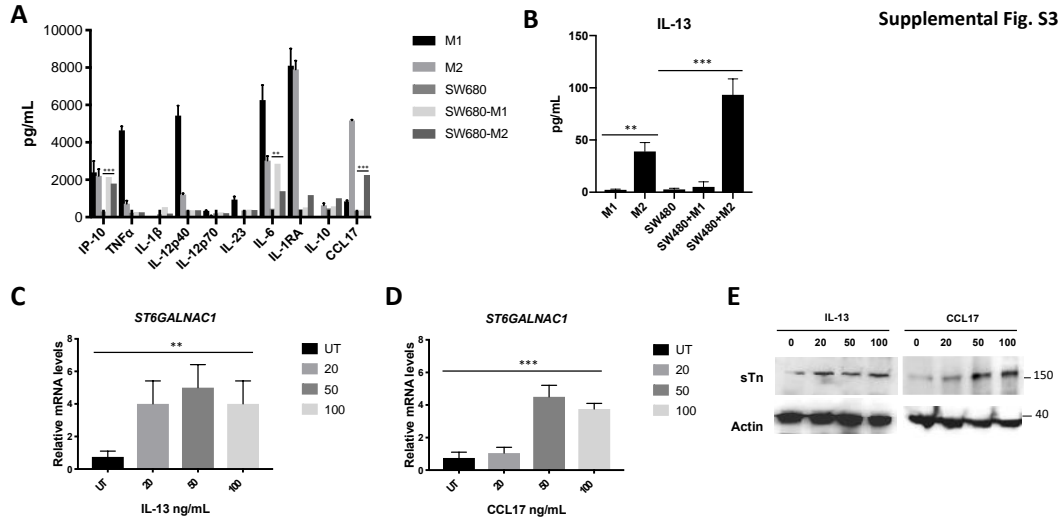

**Supplemental Fig. S3. IL-13 and CCL17 induce ST6GALNAC1 and sTn expression in SW480 colon cancer cells.** A) SW480, M1 and M2 macrophages supernatants and conditioned medium of SW480 co-cultured M1 or M2 were harvested for cytokine and chemokine analysis using the LegendPlex chemokine array. B) ELISA assay was performed to determine IL-13 cytokine expression in the indicated cell conditioned medium C-D) Real-time PCR analyses of ST6GALNAC1 in SW480 cells stimulated with IL-13 (C) or IL-CCL17 (D) at 20, 50 and 100 ng/ml or left untreated. E) Immunoblotting analysis of sTn expression in IL-13- and CCL17-treated SW480 cells. Actin was used as loading control. *P* values are calculated using one-way ANOVA with Tukey post-tests for multiple comparisons. \**p*<0.05, \*\**p*<0.01, \*\*\**p*<0.001.
