# Supplementary material
Source: PubMed Central journal article supplement (PMC7002239)
Supplement: NIHMS1546226-supplement-4.pdf [file NIHMS1546226-supplement-4.pdf]

**Supplemental Table S1.**

| <b>Logic Rules</b>                                                          | <b>References</b>   |
|-----------------------------------------------------------------------------|---------------------|
| AKT = PIP3                                                                  | [1]                 |
| CCR4 = CCL17                                                                | [2]                 |
| COX2 = (TNFAR and S1P)                                                      | [3][4][5]           |
| EP2 = PGE2                                                                  | [6]                 |
| ERK = MEK                                                                   | [7][7]              |
| GP130 = IL6                                                                 |                     |
| IKB = not IKK                                                               |                     |
| IKK = AKT and (not (TNFA and JAK2) or not ROCK or not IRAK1)                | [8][9][10]          |
| IL1                                                                         |                     |
| IL13                                                                        |                     |
| IL13R = IL13                                                                |                     |
| IL1R = IL1                                                                  |                     |
| IL23                                                                        |                     |
| IL23R = IL23                                                                |                     |
| IL6                                                                         |                     |
| IRAK1 = IL1R                                                                | [9]                 |
| JAK1 = GP130 or IL13R or TNFA                                               | [8]                 |
| JAK2 = GP130 or IL13R or TNFA or IL23R                                      | [11]                |
| MEK = RAF                                                                   | [12]                |
| MUC1STN = ST6GALNAC1                                                        |                     |
| P65 = not IKKB                                                              | [13][10][14]        |
| PGE2 = COX2                                                                 | [15]                |
| PI3K = (CCR4 and RAS and not PTEN) or (EP2 and CCR4 and VEGFR and not PTEN) | [16]                |
| PIP3 = PI3K                                                                 | [16]                |
| PTEN = ROCK and not P65                                                     | [16]                |
| RAF = RAS                                                                   | [12]                |
| RAS = GP130 or EP2 or VEGFR                                                 | [17][18]            |
| RHOA = (IL13R and CCR4 and ERK and TGFB)                                    | [2][19][20][21][22] |
| ROCK = RHOA                                                                 | [22]                |
| S1P = SPHK1                                                                 | [23]                |
| SOCS3 = STAT3                                                               | [23][24]            |
| SPHK1 = TNFA or ERK                                                         | [23][3]             |
| ST6GALNAC1 = ST6GALNAC1gene                                                 |                     |
| ST6GALNAC1gene = (STAT1 and STAT3 and STAT6), P65                           | This study          |
| STAT1 = JAK1 or TYK2                                                        | [8]                 |
| STAT3 = JAK1 or TYK2                                                        | [23][25][8]         |
| STAT6 = TYK2 or ROCK                                                        | [22][8]             |
| CCL17                                                                       |                     |
| TGFB                                                                        |                     |
| TGFBR = TGFB                                                                |                     |
| TNFA                                                                        |                     |
| TNFAR = TNFA                                                                |                     |
| TYK2 = GP130 or IL13R                                                       | [2]                 |

|              |  |
|--------------|--|
| VEGF         |  |
| VEGFR = VEGF |  |

## References

- [1] A. Carnero, C. Blanco-aparicio, O. Renner, W. Link, and J. F. M. Leal, “The PTEN / PI3K / AKT Signalling Pathway in Cancer , Therapeutic Implications,” pp. 187–198, 2008.
- [2] A. A. Al-Haidari, I. Syk, K. Jirström, and H. Thorlacius, “CCR4 mediates CCL17 (TARC)-induced migration of human colon cancer cells via RhoA/Rho-kinase signaling,” *Int. J. Colorectal Dis.*, vol. 28, no. 11, pp. 1479–1487, 2013.
- [3] S. Milstien *et al.*, “Sphingosine-1-phosphate is a missing cofactor for the E3 ubiquitin ligase TRAF2,” *Nature*, vol. 465, no. 7301, pp. 1084–1088, 2010.
- [4] G. Chen and D. V Goeddel, “TNF-R1 Signaling : A Beautiful Pathway The Fas Signaling Pathway,” *Science (80-. )*, vol. 296, no. May, pp. 1634–1635, 2002.
- [5] R. Medeiros *et al.*, “The role of TNF- $\alpha$  signaling pathway on COX-2 upregulation and cognitive decline induced by  $\beta$ -amyloid peptide,” *Behav. Brain Res.*, vol. 209, no. 1, pp. 165–173, 2010.
- [6] R. M. Breyer, C. K. Bagdassarian, S. A. Myers, and M. D. Breyer, “ P ROSTANOID R ECEPTORS : Subtypes and Signaling ,” *Annu. Rev. Pharmacol. Toxicol.*, vol. 41, no. 1, pp. 661–690, 2002.
- [7] D. Wang, F. G. Buchanan, H. Wang, S. K. Dey, and R. N. DuBois, “Prostaglandin E 2 enhances intestinal adenoma growth via activation of the ras-mitogen-activated protein kinase cascade,” *Cancer Res.*, vol. 65, no. 5, pp. 1822–1829, 2005.
- [8] D. Trufa, C. Übel, H. Sirbu, S. Finotto, and S. Mousset, “Establishing the role of tyrosine kinase 2 in cancer,” *Oncoimmunology*, vol. 2, no. 1, p. e22840, 2013.
- [9] A. Jain, S. Kaczanowska, and E. Davila, “IL-1 receptor-associated kinase signaling and its role in inflammation , cancer progression , and therapy resistance,” vol. 5, no. November, pp. 1–8, 2014.
- [10] D. Bai, L. Ueno, and P. Vogt, “Akt-mediated regulation of NF $\kappa$ B for the oncogenicity of PI3K and Akt,” *Int. J. Cancer*, vol. 125, no. 12, pp. 2863–2870, 2009.
- [11] M. W. L. Teng *et al.*, “IL-12 and IL-23 cytokines : from discovery to targeted therapies for immune-mediated inflammatory diseases,” vol. 21, no. 7, pp. 719–729, 2015.
- [12] M. D. Castellone and H. Teramoto, “Prostaglandin E 2 Promotes Colon Cancer Cell Growth Through a G s -Axin- b -Catenin Signaling Axis,” no. December, pp. 1504–1510, 2005.
- [13] N. Tokuhira, Y. Kitagishi, M. Suzuki, A. Minami, and A. Nakanishi, “PI3K / AKT / PTEN pathway as a target for Crohn ’ s disease therapy ( Review ),” pp. 10–16, 2015.
- [14] H. K. H, S. A. S, and H. Akca, “PI3K / Akt / NF- $\kappa$ B Signalling Pathway on NSCLC Invasion,” vol. 6, no. 4, pp. 234–238, 2016.
- [15] A. Greenhough *et al.*, “The COX-2/PGE2 pathway: Key roles in the hallmarks of cancer and adaptation to the tumour microenvironment,” *Carcinogenesis*, vol. 30, no. 3, pp. 377–386, 2009.
- [16] Y. Shi, B. E. Paluch, X. Wang, and X. Jiang, “PTEN at a glance,” *J. Cell Sci.*, vol. 125, no. 20, pp. 4687–4692, 2012.
- [17] P. Fischer and D. Hilfiker-Kleiner, “Role of gp130-mediated signalling pathways in the

- heart and its impact on potential therapeutic aspects,” *Br. J. Pharmacol.*, vol. 153, no. SUPPL. 1, pp. 414–427, 2008.
- [18] T. Bekaii-saab, “Spotlight on bevacizumab in metastatic colorectal cancer : patient selection and perspectives,” pp. 21–30, 2016.
- [19] A. A. Al-Haidari, I. Syk, and H. Thorlacius, “MiR-155-5p positively regulates CCL17-induced colon cancer cell migration by targeting RhoA,” *Oncotarget*, vol. 8, no. 9, pp. 14887–14896, 2017.
- [20] J. Tong, L. Li, B. Ballermann, and Z. Wang, “Phosphorylation and activation of RhoA by ERK in response to epidermal growth factor stimulation,” *PLoS One*, vol. 11, no. 1, pp. 1–26, 2016.
- [21] F. Marano *et al.*, “IL-13 alters mucociliary differentiation and ciliary beating of human respiratory epithelial cells,” *J. Clin. Invest.*, vol. 108, no. 12, pp. 1817–1824, 2002.
- [22] N. Gour and M. Wills-Karp, “IL-4 and IL-13 signaling in allergic airway disease,” *Cytokine*, vol. 75, no. 1, pp. 68–78, 2015.
- [23] J. Liang *et al.*, “Sphingosine-1-Phosphate Links Persistent STAT3 Activation, Chronic Intestinal Inflammation, and Development of Colitis-Associated Cancer,” *Cancer Cell*, vol. 23, no. 1, pp. 107–120, 2013.
- [24] A. L. Hart *et al.*, “Characteristics of intestinal dendritic cells in inflammatory bowel diseases,” *Gastroenterology*, vol. 129, no. 1, pp. 50–65, 2005.
- [25] M. K. Heather L, “Signaling Pathways Supporting Tumor Invasion in Head and Neck Squamous Cell Carcinoma,” *J. Clin. Exp. Pathol.*, vol. 05, no. 03, 2015.

**Supplemental Table S3. Update rules and references for computational model variables.**

This table shows the rules for the update of each of the elements in the model and the references that support the rules.
